# Supplementary material
Source: MDPI journal article supplement (https://www.mdpi.com/2071-1050/13/21/11853)
Supplement: s1 [file s1]

**Table S1.** Sustainability and circularity indicators for tourism - findings of the three literature reviews

| Ref.                                          | Authors                           | Sustainability Indicators/indices                                                                                                                                                                                                                                                                                                                                                                                                                                                                                                                                                                                                                                                                                                                                                                                                                                                                                                                                                                                                                                                                                                                                                                       |                                                                                                                                                                                                                                                                                                                                                                                                                                                                                                                                                   |                                                                                                                                                                                                                                                                                                                                                                                                                                                      | Life cycle orientation | Comments                                                                                                        |
|-----------------------------------------------|-----------------------------------|---------------------------------------------------------------------------------------------------------------------------------------------------------------------------------------------------------------------------------------------------------------------------------------------------------------------------------------------------------------------------------------------------------------------------------------------------------------------------------------------------------------------------------------------------------------------------------------------------------------------------------------------------------------------------------------------------------------------------------------------------------------------------------------------------------------------------------------------------------------------------------------------------------------------------------------------------------------------------------------------------------------------------------------------------------------------------------------------------------------------------------------------------------------------------------------------------------|---------------------------------------------------------------------------------------------------------------------------------------------------------------------------------------------------------------------------------------------------------------------------------------------------------------------------------------------------------------------------------------------------------------------------------------------------------------------------------------------------------------------------------------------------|------------------------------------------------------------------------------------------------------------------------------------------------------------------------------------------------------------------------------------------------------------------------------------------------------------------------------------------------------------------------------------------------------------------------------------------------------|------------------------|-----------------------------------------------------------------------------------------------------------------|
|                                               |                                   | Environmental pillar                                                                                                                                                                                                                                                                                                                                                                                                                                                                                                                                                                                                                                                                                                                                                                                                                                                                                                                                                                                                                                                                                                                                                                                    | Economic pillar                                                                                                                                                                                                                                                                                                                                                                                                                                                                                                                                   | Social pillar                                                                                                                                                                                                                                                                                                                                                                                                                                        |                        |                                                                                                                 |
| A) Meta review sustainable tourism assessment |                                   |                                                                                                                                                                                                                                                                                                                                                                                                                                                                                                                                                                                                                                                                                                                                                                                                                                                                                                                                                                                                                                                                                                                                                                                                         |                                                                                                                                                                                                                                                                                                                                                                                                                                                                                                                                                   |                                                                                                                                                                                                                                                                                                                                                                                                                                                      |                        |                                                                                                                 |
| 40                                            | Schianetz et al., 2007            | (i) pressure or stress indicator (Pressures caused by human activities that affect environment, culture and economy, e.g., Water shortages or crime indices) [79,80];<br>(ii) state indicator (Current state of the industry, e.g., Number of local people employed by the tourism industry) [79];<br>(iii) response indicator (The response of society and management efforts to solve problems identified by other indicators (e.g., stress, pressure and state), e.g., Introduction of taxes, cleanup costs for coastal contamination) [79];<br>(iv) impact indicator (Impacts on the social and economic functions of the tourism destination, e.g., Loss of biodiversity, changes of income levels of local communities) [81];<br>(v) performance (The performance (distance to target) of the industry, e.g., Waste generated/ waste target) [81];<br>(vi) efficiency (The efficiency of human activities to resolve identified problems (comparison of gain and expenditure), e.g., Energy-efficiency of cars, buildings) [81];<br>(vii) early warning indicator (Observable changes that could affect the sustainability of the industry, e.g., Decline in tourists who intend to return) [13]. |                                                                                                                                                                                                                                                                                                                                                                                                                                                                                                                                                   |                                                                                                                                                                                                                                                                                                                                                                                                                                                      | Not mentioned          | Focus on Destination                                                                                            |
| 10                                            | Torres-Delgado and Saarinen, 2014 | (i) air quality index; amount of erosion on the natural site; frequency of environmental accidents related to tourism);<br>(ii) urbanisation; production of energy from renewable sources; ecological state of fresh water; percentage of separate waste collection; percentage of farming area occupied by organic farming;<br>(iii) no. of tourists per square metre of beaches in coastal zone; no. of peak-season tourists per square metre of beaches; waste volume produced by                                                                                                                                                                                                                                                                                                                                                                                                                                                                                                                                                                                                                                                                                                                    | (i) availability of local credit to local business; employment growth in tourism; percent of income leakage out of the community;<br>(ii) employment rate; no. of enterprises with ISO 14001 or Environmental Management and Audit Scheme (EMAS) certificate; rate of new enterprises survived after 18 months; female entrepreneurship; rate of commuting population; per capita value added;<br>(iii) total no. of tourist arrivals in coastal zone; daily average expenditures of sun and beach tourists; ratio of peak-month tourists to low- | (i) resident involvement in tourism industry, visitor satisfaction/attitude towards tourist destinations, litter/pollution;<br>(ii) N/A;<br>(iii) ratio of tourists to locals; ratio of peak season tourists to locals; sports facilities per inhabitant available to the community; health centres per inhabitant available to the community; public transport vehicles for travellers and merchandise per inhabitant; ratio of peak-season tourism | Not mentioned          | Proposals that were relevant to the objective of this article include:<br>(i) [70];<br>(ii) [71];<br>(iii) [72] |

|    |                               |                                                                                                                                                                                                                                                                                                                                                                                                                                                                                                                                                                                                                                                                                                                                      |                                                                                                                                                                                                                                                                                                                                                  |                                                                                                                                                                          |               |                                  |
|----|-------------------------------|--------------------------------------------------------------------------------------------------------------------------------------------------------------------------------------------------------------------------------------------------------------------------------------------------------------------------------------------------------------------------------------------------------------------------------------------------------------------------------------------------------------------------------------------------------------------------------------------------------------------------------------------------------------------------------------------------------------------------------------|--------------------------------------------------------------------------------------------------------------------------------------------------------------------------------------------------------------------------------------------------------------------------------------------------------------------------------------------------|--------------------------------------------------------------------------------------------------------------------------------------------------------------------------|---------------|----------------------------------|
|    |                               | destinations; volume of glass recycled; percentage of energy consumption attributed to tourism; percentage of renewable energy consumption attributed to tourism; consumption of urban supplying water attributed to tourism; volume of water reused; volume of sewage receiving treatment; percentage of coastal zone considered to be in eroded state; percentage of beach area considered to be in high-urbanisation state; percentage of sampling points with good sanitary qualification; percentage of beach area with Blue Flag status; percentage of beach area with cleaning services; percentage of beach area considered to be protected natural area; percentage of beach area considered to be in high-occupation state | month tourists; occupancy rate for official accommodations; ratio of average peak-season occupancy rate to average low-season occupancy rate for official accommodations; percentage of official tourism accommodation establishments which open all year; ratio of tourism employment to total employment; public investments in coastal issues | employment to low-season tourism employment; percentage of beach area without security devices in coastal zone; no. of crimes and misdemeanours made at provincial level |               |                                  |
| 41 | Kristjánsdóttir et al., 2017  | no specific examples of indicators                                                                                                                                                                                                                                                                                                                                                                                                                                                                                                                                                                                                                                                                                                   |                                                                                                                                                                                                                                                                                                                                                  |                                                                                                                                                                          | Not mentioned | - Focus on integrated indicators |
| 42 | Caldeira Sanches et al., 2018 | no specific examples of indicators                                                                                                                                                                                                                                                                                                                                                                                                                                                                                                                                                                                                                                                                                                   |                                                                                                                                                                                                                                                                                                                                                  |                                                                                                                                                                          | Not mentioned |                                  |
| 43 | Manrai et al., 2020           | tourist arrivals, average tourist nights, total tourist nights, expenditure per tourists stay, expenditure per tourist night, gross tourism receipts, foreign exchange leakage, net tourism receipts, population and per capita net tourism receipts; low local crime rate, clean food and water                                                                                                                                                                                                                                                                                                                                                                                                                                     |                                                                                                                                                                                                                                                                                                                                                  |                                                                                                                                                                          | Not mentioned | Focus on Destination             |

|                                                |                                        |                                                                                                                                                                                                                                                                                                            |                                                                                                                                                                                                                                                                                                           |                                                                                                                                                                                                                                                                                                                         |                                                     |                                                                                                      |
|------------------------------------------------|----------------------------------------|------------------------------------------------------------------------------------------------------------------------------------------------------------------------------------------------------------------------------------------------------------------------------------------------------------|-----------------------------------------------------------------------------------------------------------------------------------------------------------------------------------------------------------------------------------------------------------------------------------------------------------|-------------------------------------------------------------------------------------------------------------------------------------------------------------------------------------------------------------------------------------------------------------------------------------------------------------------------|-----------------------------------------------------|------------------------------------------------------------------------------------------------------|
| 9                                              | Marković Vukadin et al., 2020          | reduction the of impact from the energy and traffic sectors, mitigation of and adaptation to climate change, sustainable waste management, wastewater treatment, water management, landscape and biodiversity protection, light and noise pollution, and achieving satisfactory water quality for swimming | tourism traffic, business results of tourism enterprises, quantity and quality of employment, safety and health, tourism supply chain                                                                                                                                                                     | (social and cultural) impact on community/ society, gender equality, conservation and enhancement of cultural heritage, local identity and property                                                                                                                                                                     | Not mentioned                                       | Proposal of the European Tourism Indicators System (includes also destination management indicators) |
| 8                                              | Purwaningsih et al., 2020              | reducing impact, management, impact, resource efficiency, use of resources, biodiversity, sanitation, infrastructure, environment protection, climate change, pollution, attitude toward environmental protection                                                                                          | competitiveness, branding, local prosperity, tourism flow (volume and value at destination, tourism employs, business enterprise related to destination, and sustaining tourist satisfaction                                                                                                              | visitor fulfilment, safety and health, culture richness and exchange, visitor compliance, local interaction, population, psychological, effect on level of well-being in local population, soft infrastructure related to tourism, conservation of cultural heritage, protecting culture and accessibility to inclusion | Not mentioned                                       | N/A                                                                                                  |
| 44                                             | Rasoolimanesh et al., 2020             | no specific examples of indicators                                                                                                                                                                                                                                                                         |                                                                                                                                                                                                                                                                                                           |                                                                                                                                                                                                                                                                                                                         | Not mentioned                                       | N/A                                                                                                  |
| B) sustainable tourism assessment based on LCT |                                        |                                                                                                                                                                                                                                                                                                            |                                                                                                                                                                                                                                                                                                           |                                                                                                                                                                                                                                                                                                                         |                                                     |                                                                                                      |
| 45                                             | Filimonau, 2011                        | annual energy use                                                                                                                                                                                                                                                                                          |                                                                                                                                                                                                                                                                                                           |                                                                                                                                                                                                                                                                                                                         | Yes, based on the LCT concept                       |                                                                                                      |
| 46                                             | Cavalcanti Falcão and Pasa Gómez, 2012 | environmental education (community access to environmental education, valuing environmental heritage); conservation and protection of the tourist product (preservation of natural resources, carrying capacity of                                                                                         | encouraging entrepreneurship (credit sources for local entrepreneurs, training and encouraging the opening of small businesses, nature of business of destination); economic viability of tourism activity (tourism infrastructure, seasonality); capacity for income expansion (participation of tourism | quality of community life (access to health, access to education, public transportation, housing); dynamics of tourism in the destination (tourist frequency density, training the population for tourism)                                                                                                              | Yes, based on the Tourist Area Life Cycle Evolution | N/A                                                                                                  |

|    |                           |                                                                                                                                                                       |                                                                                                                                                                                                                   |                                                                                                                                                                                                                                                                                      |                                                     |                                                                                             |
|----|---------------------------|-----------------------------------------------------------------------------------------------------------------------------------------------------------------------|-------------------------------------------------------------------------------------------------------------------------------------------------------------------------------------------------------------------|--------------------------------------------------------------------------------------------------------------------------------------------------------------------------------------------------------------------------------------------------------------------------------------|-----------------------------------------------------|---------------------------------------------------------------------------------------------|
|    |                           | natural attractions, visual pollution, noise pollution)                                                                                                               | activity in the local economy, job creation)                                                                                                                                                                      |                                                                                                                                                                                                                                                                                      |                                                     |                                                                                             |
| 47 | Soares et al., 2012       | massification, deficient infrastructures, water pollution, visual pollution, congestion and traffic, erosions, ecological disorders                                   | contribution of tourism to GDP, participation of tourism in the economy in relation to other economic activities (monoculture), jobs generated, salaries, profitability of the private sector, imports, inflation | (not specifically called Social) the perception of residents about the impacts (social carrying capacity), the perception of residents about tourists, unemployment rate, security. overcrowding: permanent population / number of tourists, increase in population density          | Yes, based on the Tourist Area Life Cycle Evolution | Focus on coastal destinations                                                               |
| 48 | Arcese et al., 2013       |                                                                                                                                                                       |                                                                                                                                                                                                                   | fair salary (workers), health and safety (customers), privacy (customers), transparency (customers), cultural heritage (local community)                                                                                                                                             | Yes, based on the LCT concept                       | Focus only on Social Life Cycle Assessment                                                  |
| 49 | Filimonau, 2016           | climate change, acidification, nutrient enrichment, photochemical oxidants                                                                                            |                                                                                                                                                                                                                   |                                                                                                                                                                                                                                                                                      | Yes, based on the LCT concept                       | N/A                                                                                         |
| 50 | Kulkajonplun et al., 2016 | loss of biodiversity; land management (based on philosophy of sufficiency economy); carbon emission into the air; use of renewable energy; energy use; climate change | GPP; capital, sales and profits; investment (finance, human resources, environment and renewable energy); value creation                                                                                          | bribery/fraud; employment rights/security; development of human resources; equality of labour; health and safety; human rights/business ethics; management of workers; building relationship with communities; local participation in organization; development of local communities | Yes, based on the LCT concept                       | - Focus on sustainable resorts<br>- Index, developed based on the Global Report Initiative: |

|    |                               |                                                                                                                                                                                                  |  |  |                                                     |                                                                                                                            |
|----|-------------------------------|--------------------------------------------------------------------------------------------------------------------------------------------------------------------------------------------------|--|--|-----------------------------------------------------|----------------------------------------------------------------------------------------------------------------------------|
| 51 | Michailidou et al., 2016      | (i) energy-oriented, (ii) water-oriented, (iii) waste-oriented, (iv) carbon footprint-oriented (hotels) and (v) carbon footprint-oriented (transport).                                           |  |  | Yes, based on the LCT concept                       | - Focus on a Defined Area of Concentrated Tourism<br>- Name of indicator: Tourism Environmental Composite Indicator (TECI) |
| 52 | Steinmann et al., 2016        | (i) climate change, ozone depletion, the combined effects of acidification and eutrophication, terrestrial ecotoxicity, marine ecotoxicity, and land use;<br>(ii) energy, water, land, materials |  |  | Yes, based on the LCT concept                       | N/A                                                                                                                        |
| 53 | Kalbar et al., 2017           | carbon footprint (partially)                                                                                                                                                                     |  |  | Yes, based on the LCT concept                       | Focus on urban consumption                                                                                                 |
| 54 | Puig et al., 2017             | carbon footprint                                                                                                                                                                                 |  |  | Yes, based on the LCT concept                       |                                                                                                                            |
| 55 | Todorovic, 2019               | no specific examples of indicators                                                                                                                                                               |  |  | Yes, based on the Tourist Area Life Cycle Evolution | Focus on Destination                                                                                                       |
| 56 | Zagonari, 2019                | no specific examples of indicators                                                                                                                                                               |  |  | Yes, based on the LCT concept                       | Use of weighted life-cycle assessment is better than multi-criteria analysis for alternative tourism                       |
| 57 | Cavallin Toscani et al., 2021 | no specific examples of indicators                                                                                                                                                               |  |  | Yes, based on the LCT concept                       | Focus on events                                                                                                            |
| 58 | Soratana et al., 2021         | (i) raw materials (appropriateness of attraction to local material environmental conditions, quality of local's environment);                                                                    |  |  | Yes, based on the LCT concept                       | Based on the Global Sustainable Tourism Council                                                                            |

|                                |                                             |                                                                                                                                                                                                                                                                                                                                                                                                                                                                                                                                                                                                                                                                       |                                                                                      |                                                                      |
|--------------------------------|---------------------------------------------|-----------------------------------------------------------------------------------------------------------------------------------------------------------------------------------------------------------------------------------------------------------------------------------------------------------------------------------------------------------------------------------------------------------------------------------------------------------------------------------------------------------------------------------------------------------------------------------------------------------------------------------------------------------------------|--------------------------------------------------------------------------------------|----------------------------------------------------------------------|
|                                |                                             | (ii) operation (budget for environmental management, units for environmental protection including cleaning, systems to manage, control and monitor resource consumption, natural disaster prevention, communication on environmental awareness for tourists, policy, laws and regulations related to attraction's environment);<br>(iii) use (promoting on energy consumption reduction to stakeholders, promoting on water consumption reduction to stakeholders, promoting on other resources consumption reduction to stakeholders);<br>(iv) end of life (wastewater treatment system before discharging, waste disposal system including waste collection system) |                                                                                      | criteria, integrated with LCT                                        |
| C) circular tourism assessment |                                             |                                                                                                                                                                                                                                                                                                                                                                                                                                                                                                                                                                                                                                                                       |                                                                                      |                                                                      |
|                                |                                             | <b>Circularity Indicators/indices</b>                                                                                                                                                                                                                                                                                                                                                                                                                                                                                                                                                                                                                                 |                                                                                      |                                                                      |
| 59                             | Zhao & Thao, 2011                           | resource use efficiency, recycling rate, environmental protection of resources, environmental monitoring and certification, economic importance, tourism revenue, management efficiency and social benefits                                                                                                                                                                                                                                                                                                                                                                                                                                                           | Not mentioned, but potentially compatible for some of them                           | Focus on tourism site                                                |
| 60                             | Scheepens et al., 2016                      | Eco-costs Value Ratio (EVR) model, including costs, market value and eco-costs, two methods are applied for analysis and design: Eco-efficient Value Creation (EVR benchmarking) and the Circular Transition Framework (describing stakeholder activities which are required for the transition towards sustainable business models).                                                                                                                                                                                                                                                                                                                                 | Yes, based on LCT concept                                                            | Focus on tourism service in coastal destination                      |
| 61                             | Maugeri et al. 2017                         | LCA of one-night stay including transport from hotel by car, but circular economy not really central to paper                                                                                                                                                                                                                                                                                                                                                                                                                                                                                                                                                         | Yes, based on the LCT concept                                                        | Focus on accommodation                                               |
| 62                             | Nocca, 2017                                 | number of restoration and adaptation works undertaken on historic buildings/sites, the percentage of re-functionalized historic buildings, and the area of facades of historic buildings rehabilitated (m <sup>2</sup> )                                                                                                                                                                                                                                                                                                                                                                                                                                              | LCT is mentioned in the context of CE (also closing the loop)                        | Focus on cultural heritage                                           |
| 63                             | Pan et al., 2018                            | renewable energy, energy saving, green transport, low-carbon building, environment greening, circular resources, low-carbon life, management mechanism, education and training, partnership                                                                                                                                                                                                                                                                                                                                                                                                                                                                           | Yes, also based on LCT concept                                                       | Focus on tourism destination<br>- Self-developed indicator framework |
| 64                             | Randazzo et al., 2019                       | mainly about energy use (kWh)                                                                                                                                                                                                                                                                                                                                                                                                                                                                                                                                                                                                                                         | LCT is mentioned in the context of system boundaries                                 | Focus on energy management in island tourism destination             |
| 65                             | Son et al., 2018                            | waste generation rate, waste separation rate, recycling potential, composting potential, separated food residue, non-recyclable residue                                                                                                                                                                                                                                                                                                                                                                                                                                                                                                                               | Not mentioned                                                                        | Focus on accommodation                                               |
| 66                             | Hartley-Ballesterro & Suárez-Espinoza, 2020 | increase of forest surface, quantity of provinces with spatial planning management, communities with community-based rural tourism, organisations with sustainable tourism, percentage of water treated, water supply, electricity supply, internet coverage, drinking water quality, treated industrial discharges, treated wastewater, environmental education, separation and recycling of solid waste, protected areas management                                                                                                                                                                                                                                 | Not mentioned, but potentially compatible (mentions biological and water life cycle) | Focus on protected forest tourism destination                        |

|    |                       |                                                                                                                                                                                                                                                               |                                    |                                            |
|----|-----------------------|---------------------------------------------------------------------------------------------------------------------------------------------------------------------------------------------------------------------------------------------------------------|------------------------------------|--------------------------------------------|
|    |                       | plan, tourist police, use of drinking water, control of drinking water use, reforestation campaigns, water protection                                                                                                                                         |                                    |                                            |
| 67 | Voukkali et al., 2021 | driving forces–pressure–state–impact–response (DPSIR) concept approach to evaluate the study area, clean index identification, waste accumulation index (WAI) and waste accumulation rate, Waste compositional analysis, circular economy only mentioned once | Not mentioned (only in lit review) | Focus on waste management in coastal areas |
